# Supplementary material
Source: PubMed Central journal article supplement (PMC1847869)
Supplement: bmj_334_7596_725__1.pdf [file bmj_334_7596_725__1.pdf]

## Web references

- W1. Avis NE, Brockwell S, Colvin A. A Universal Menopausal Syndrome? *Am J Med* 2005;118: 37S-46S.
- W2. Notelovitz M, Lenihan JP, McDermot M et al. Initial 17 $\beta$ -estradiol Dose for Treating Vasomotor Symptoms. *Obstet Gynecol* 2000;95:726-731
- W3. US Preventative Services Task Force. Hormone Therapy for prevention of chronic conditions in postmenopausal women: recommendations from the US Preventive Services Task Force. *Ann Intern Med* 2005;142:855-860
- W4. RCOG. Menopause and Hormone replacement-study group statement. Available at <http://www.rcog.org.uk/index.asp?PageID=310>
- W5. Jackson RD, La Croix AZ, Gass M et al. Calcium plus Vitamin D supplementation and the risk of fractures. *N Engl J Med* 2006 ; 354 :669-683
- W6. International Menopause Society Expert Workshop-Controversial issues in climacteric medicine IV. Postmenopausal osteoporosis: therapeutic options. *Climacteric* 2005; 899:99-109.
- W7. Stevenson JC. HRT, osteoporosis and regulatory authorities. Quis custodiet ipsos custodies? *Human Reproduction* 2006;21:1668-1672
- W8. Cauley JA, Robbins J, Chen Z et al. Effects of Estrogen plus Progestin on Risk of Fracture and Bone Mineral Density. *JAMA*. 2003;290 :1729-1738
- W9. Peeyananjarassi K and Baber R. Effects of low-dose hormone therapy on menopausal Symptoms, bone density, endometrium, and the cardiovascular system: a review of randomized clinical trials. *Climacteric* 2005; 8:13-23
- W10. Gangar KF, Fraser D, Whitehead MI, Cust MP. Prolonged endometrial stimulation associated with oestradiol implants. *BMJ* 1900;300:436-438
- W11. Varma R, Sinha D, Gupta JK. Non-contraceptive uses of levonorgestrel-releasing hormone system (LNG-IUS)-A systematic enquiry and overview. *Eur J O G and Reproductive Biology*. 2006; 125:9-28
- W12. Hampton NRE, Rees MCP, Lowe DG et al. Levonorgestrel intrauterine system(LNG-IUS) with conjugated oral equine estrogen: a successful regimen for HRT in perimenopausal women. *Human Reproduction* 2005;20:2653-2660)
- W13. Haimov-Kochman R and Hochner-Celnikier D. Hot flashes revisited: Pharmacological and herbal options for hot flashes management. What does the evidence tell us? *Acta Obstet Gynecol Scand* 2005; 84:972-979.
- W14. Bygdeman M, Swahn ML. Replens versus dienoestrol cream in the symptomatic treatment of vaginal atrophy in postmenopausal women. *Maturitas* 1996;23:259-263.
- W15. Somboonporn W, Davis S, Seif MW, Bell R. 2005. Testosterone for peri-and postmenopausal women. *Cochrane Database Syst Rev* 2005;4: CD004509
- W16. Harman SM, Brinton EA, Cedars M et al. KEEPS: the Kronos Early Estrogen Prevention Study. *Climacteric* 2005; 8: 3-12.
